# Supplementary material for: Mechanisms and origin of regioselectivity for manganese-catalyzed denitrogenative annulation and click reactions
Source: Royal Society of Chemistry journal article supplement (doi:10.1039/d3qo00406f), 2023-01-01
Supplement: d3qo00406f2.pdf [file d3qo00406f2.pdf]

## *Supporting Information*

### **Mechanisms and Origin of Regioselectivity for Manganese-Catalyzed**

#### **Denitrogenative Annulation and Click Reactions**

Guanghui Song, Wei Rong, Yongyin Liu, and Juan Li\*

College of Chemistry and Materials Science, Guangdong Provincial Key Laboratory of Functional Supramolecular Coordination Materials and Applications, Jinan University, Guangzhou, Guangdong 510632, P. R. China

\*Corresponding author. Email: tchjli@jnu.edu.cn

---

### **Table of Contents**

---

|                  |                                                                    |     |
|------------------|--------------------------------------------------------------------|-----|
| <b>Section 1</b> | Simplification of the TPP ligand. (Scheme S1&Table S1)             | S2  |
| <b>Section 2</b> | Optimization with B3LYP-D3, M06 and BPW91 methods. (Tables S2-S3)  | S3  |
| <b>Section 3</b> | Other possible nitrogen elimination process. (Scheme S2)           | S5  |
| <b>Section 4</b> | Mechanistic details for the doublet-state pathway. (Figs. S1-S3)   | S6  |
| <b>Section 5</b> | Pathways without the assistance of a Mn catalyst. (Fig. S4)        | S9  |
| <b>Section 6</b> | Pathways without the assistance of CuI. (Fig. S5)                  | S10 |
| <b>Section 7</b> | Relaxed energy scans for MECF. (Fig. S6)                           | S11 |
| <b>Section 8</b> | Energies (in hartree) for all TSs and intermediates.               | S12 |
| <b>Section 9</b> | Calculated imaginary frequencies of all transition states species. | S16 |

---

## Section 1. Simplification of the TPP ligand

**Scheme S1** The simplification of Mn(TPP)Cl to Mn(Por)Cl.

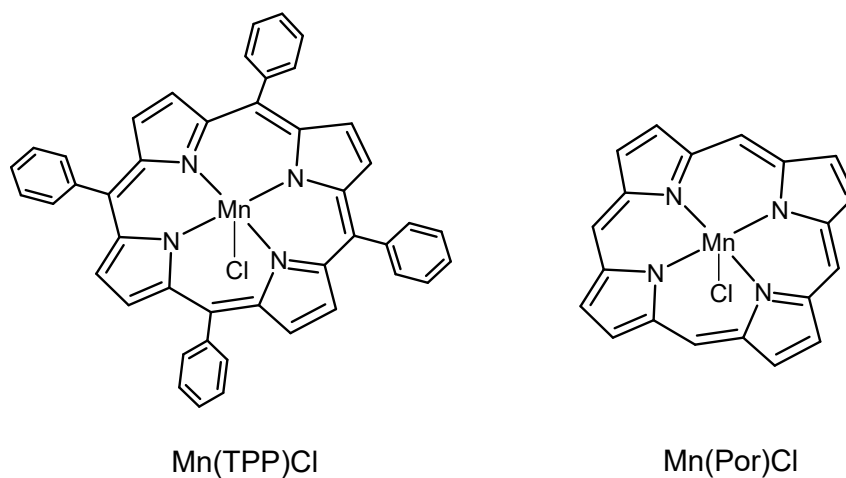

**Table S1** Relative Gibbs energies (in kcal/mol) for the regio-determining transition states with real TPP ligand.

| Species                     | $\Delta\Delta G$ |
|-----------------------------|------------------|
| 1-TS3A-TPP <sup>6</sup>     | 0.0              |
| 1-TS3A-TPP <sup>4</sup>     | 0.6              |
| 1-TS3A-iso-TPP <sup>6</sup> | 16.0             |
| 1-TS3A-iso-TPP <sup>4</sup> | 14.8             |
| -----                       |                  |
| 2-TS3B-TPP <sup>6</sup>     | 0.0              |
| 2-TS3B-TPP <sup>4</sup>     | 19.2             |
| 2-TS3-TPP <sup>6</sup>      | 11.6             |
| 2-TS3-TPP <sup>4</sup>      | 31.8             |

## Section 2. Optimization with B3LYP-D3, M06 and BPW91 methods

**Table S2** Relative Gibbs energies (in kcal/mol) for the regio-determining transition states with B3LYP-D3 method.

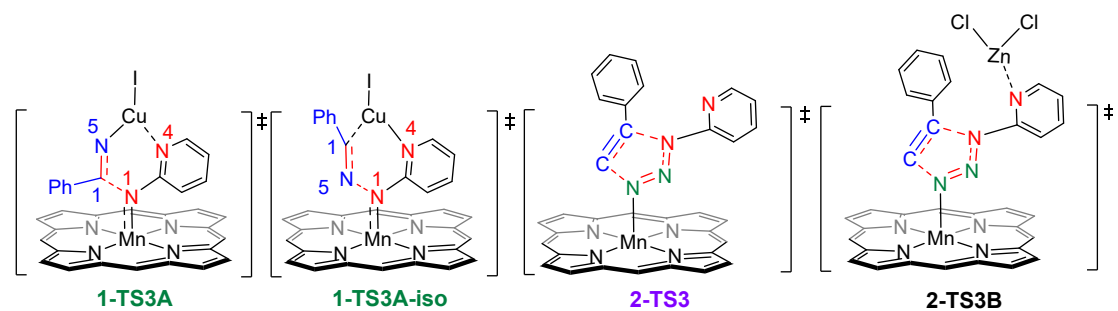

| Species                          | $\Delta\Delta G$ |
|----------------------------------|------------------|
| 1-TS3A-B3LYP-D3 <sup>4</sup>     | 0.0              |
| 1-TS3A-B3LYP-D3 <sup>6</sup>     | 0.6              |
| 1-TS3A-iso-B3LYP-D3 <sup>4</sup> | 28.6             |
| 1-TS3A-iso-B3LYP-D3 <sup>6</sup> | 11.8             |
| <hr/>                            |                  |
| 2-TS3B-B3LYP-D3 <sup>6</sup>     | 0.0              |
| 2-TS3B-B3LYP-D3 <sup>4</sup>     | 6.1              |
| 2-TS3-B3LYP-D3 <sup>6</sup>      | 13.4             |
| 2-TS3-B3LYP-D3 <sup>4</sup>      | 30.4             |

**Table S3** Relative Gibbs energies (in kcal/mol) for the regio-determining transition states with M06 and BPW91 methods.

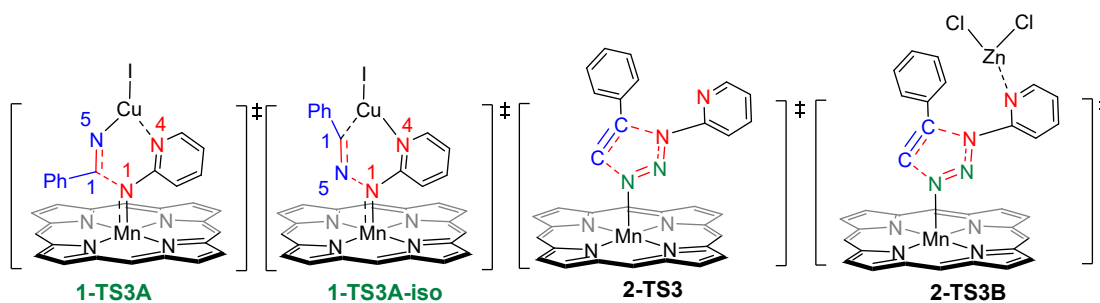

| Species                       | $\Delta\Delta G$ |
|-------------------------------|------------------|
| 1-TS3A-M06 <sup>6</sup>       | 0.0              |
| 1-TS3A-M06 <sup>4</sup>       | 29.6             |
| 1-TS3A-iso-M06 <sup>4</sup>   | 12.8             |
| 1-TS3A-iso-M06 <sup>6</sup>   | 15.6             |
| -----                         |                  |
| 2-TS3B-M06 <sup>6</sup>       | 0.0              |
| 2-TS3B-M06 <sup>4</sup>       | 8.5              |
| 2-TS3-M06 <sup>4</sup>        | 27.9             |
| 2-TS3-M06 <sup>6</sup>        | 14.2             |
| -----                         |                  |
| 1-TS3A-BPW91 <sup>6</sup>     | 0.0              |
| 1-TS3A-BPW91 <sup>4</sup>     | 11.2             |
| 1-TS3A-iso-BPW91 <sup>4</sup> | 18.8             |
| 1-TS3A-iso-BPW91 <sup>6</sup> | 20.4             |
| -----                         |                  |
| 2-TS3B-BPW91 <sup>6</sup>     | 0.0              |
| 2-TS3B-BPW91 <sup>4</sup>     | 4.9              |
| 2-TS3-BPW91 <sup>4</sup>      | 20.5             |
| 2-TS3-BPW91 <sup>6</sup>      | 4.0              |

### Section 3. Other possible nitrogen elimination process

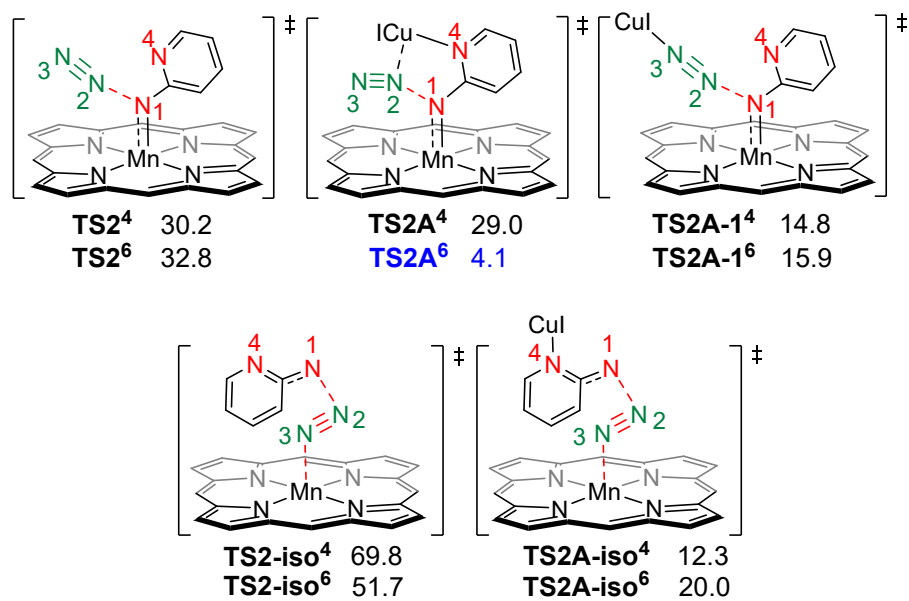

**Scheme S2** Other possible nitrogen-elimination transition state. Values shown are relative free energies in kcal/mol.

## Section 4. Mechanistic details for the doublet-state pathway

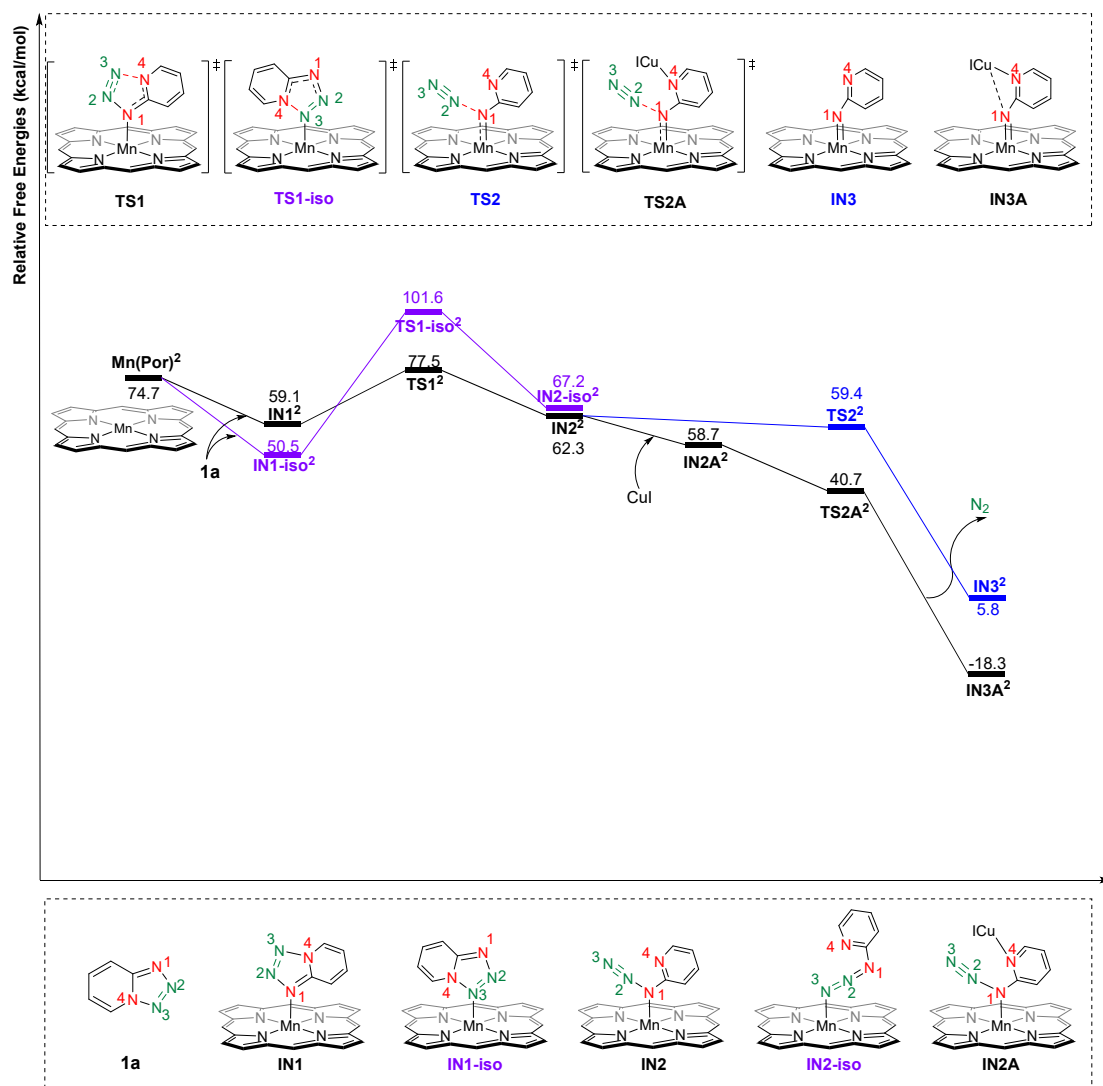

**Fig. S1** Calculated free-energy profiles for first two steps of the denitrogenative annulation along the doublet energy surface. The tetrazole ring-opening with Mn–N3 coordination is shown in purple while N<sub>2</sub> elimination without the assistance of CuI is shown in blue. The numerical values provided are relative free energies in kcal/mol.

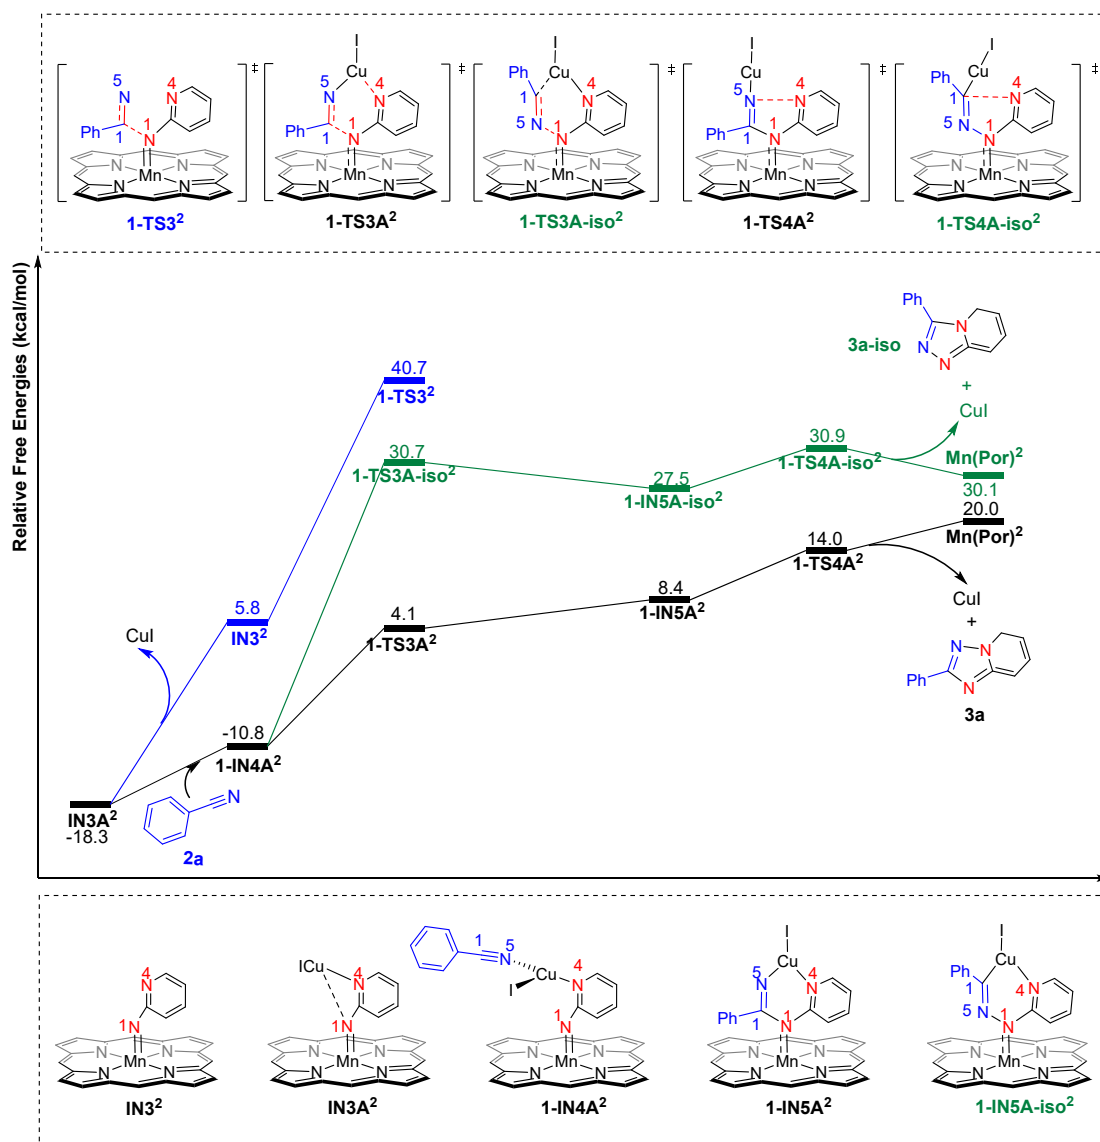

**Fig. S2** Calculated free-energy profiles for the last two steps of the denitrogenative annulation along the doublet energy surface. The pathway for the formation of regioisomer **3a-iso** is shown in green while that without the assistance of CuI is shown in blue. Numerical values are relative free energies in kcal/mol.

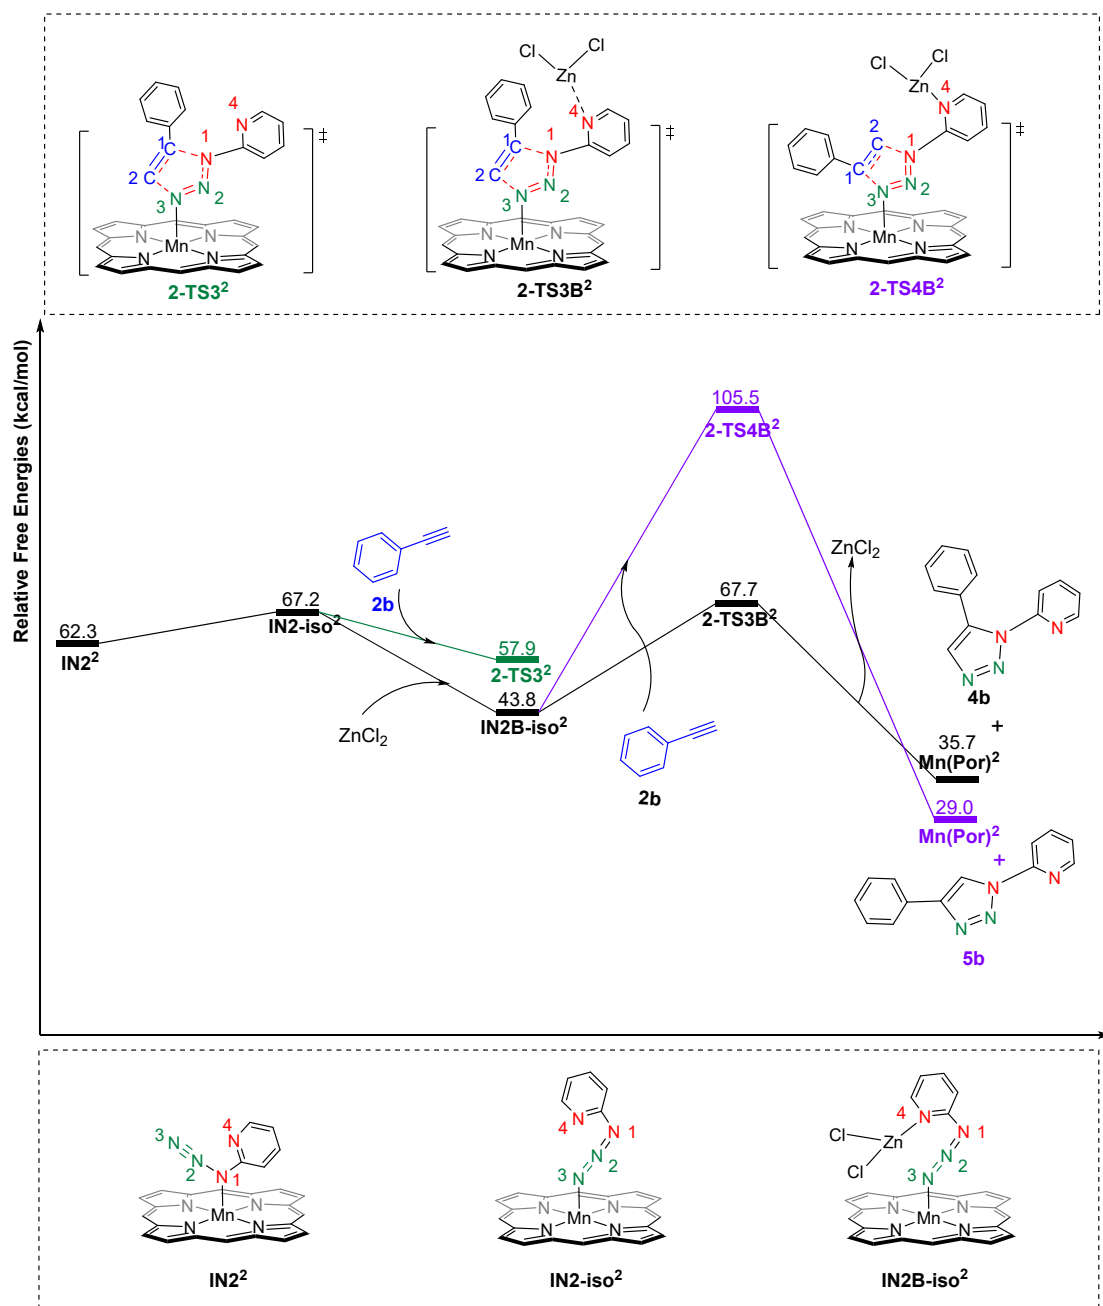

**Fig. S3** Calculated free energy profiles for the last two steps of the click reaction. The pathway for the formation of regioisomer **5b** is shown in purple while that without the assistance of  $\text{ZnCl}_2$  is in green. Numerical values are relative free energies in kcal/mol.

## Section 5. Pathways without the assistance of a Mn catalyst



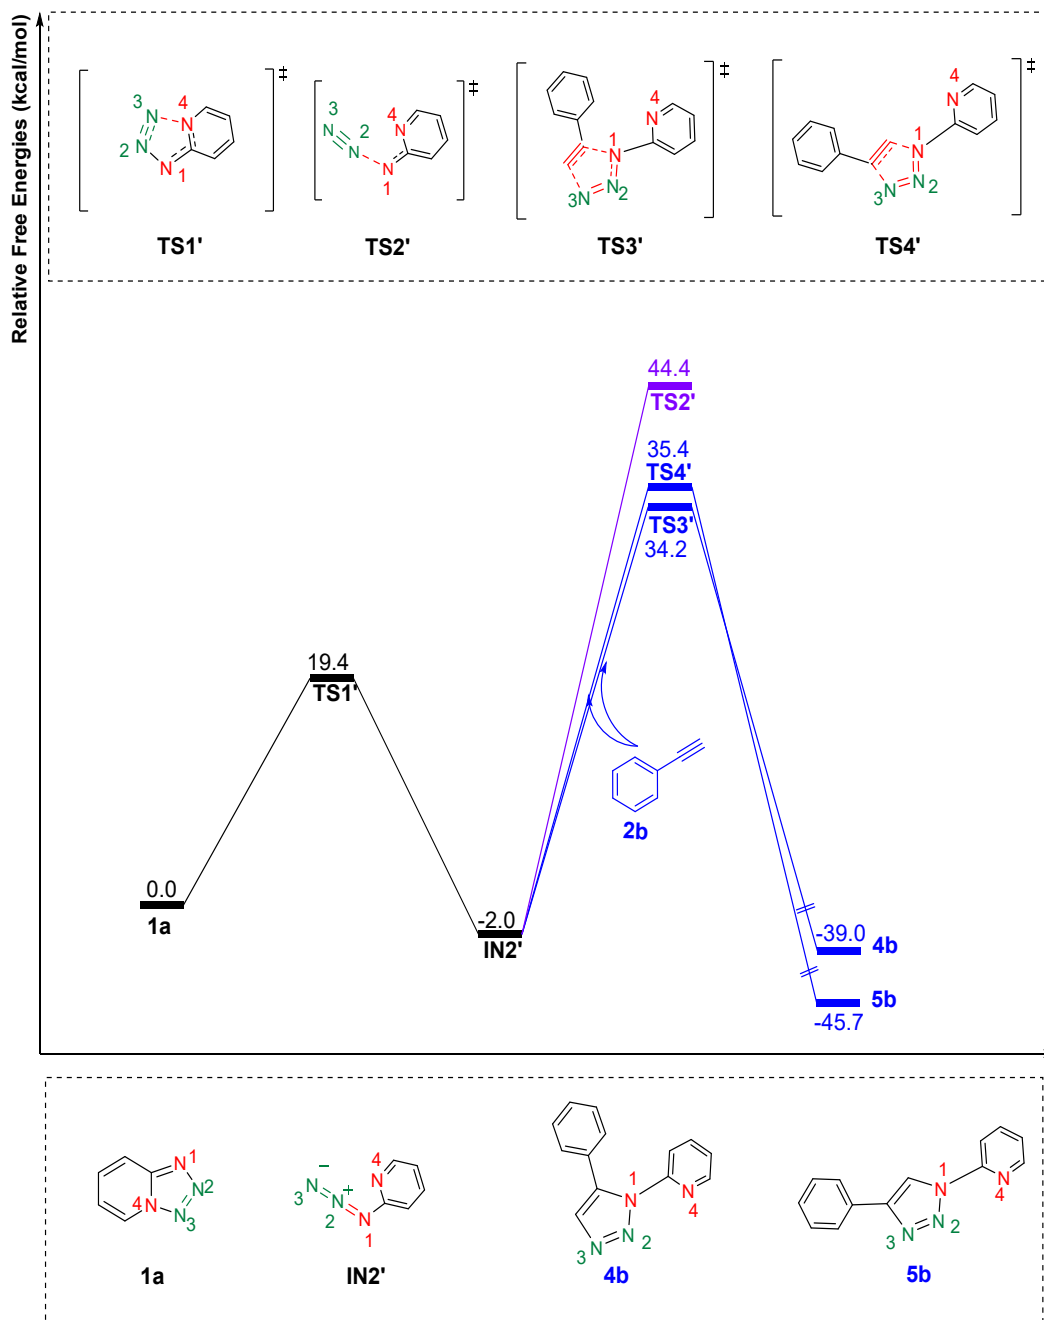

**Fig. S4** Calculated free-energy profiles for first two steps of the denitrogenative annulation and click reactions without the assistance of a Mn catalyst. The denitrogenative annulation is shown in purple while click reaction is shown in blue. The numerical values provided are relative free energies in kcal/mol.

## Section 6. Pathways without the assistance of CuI

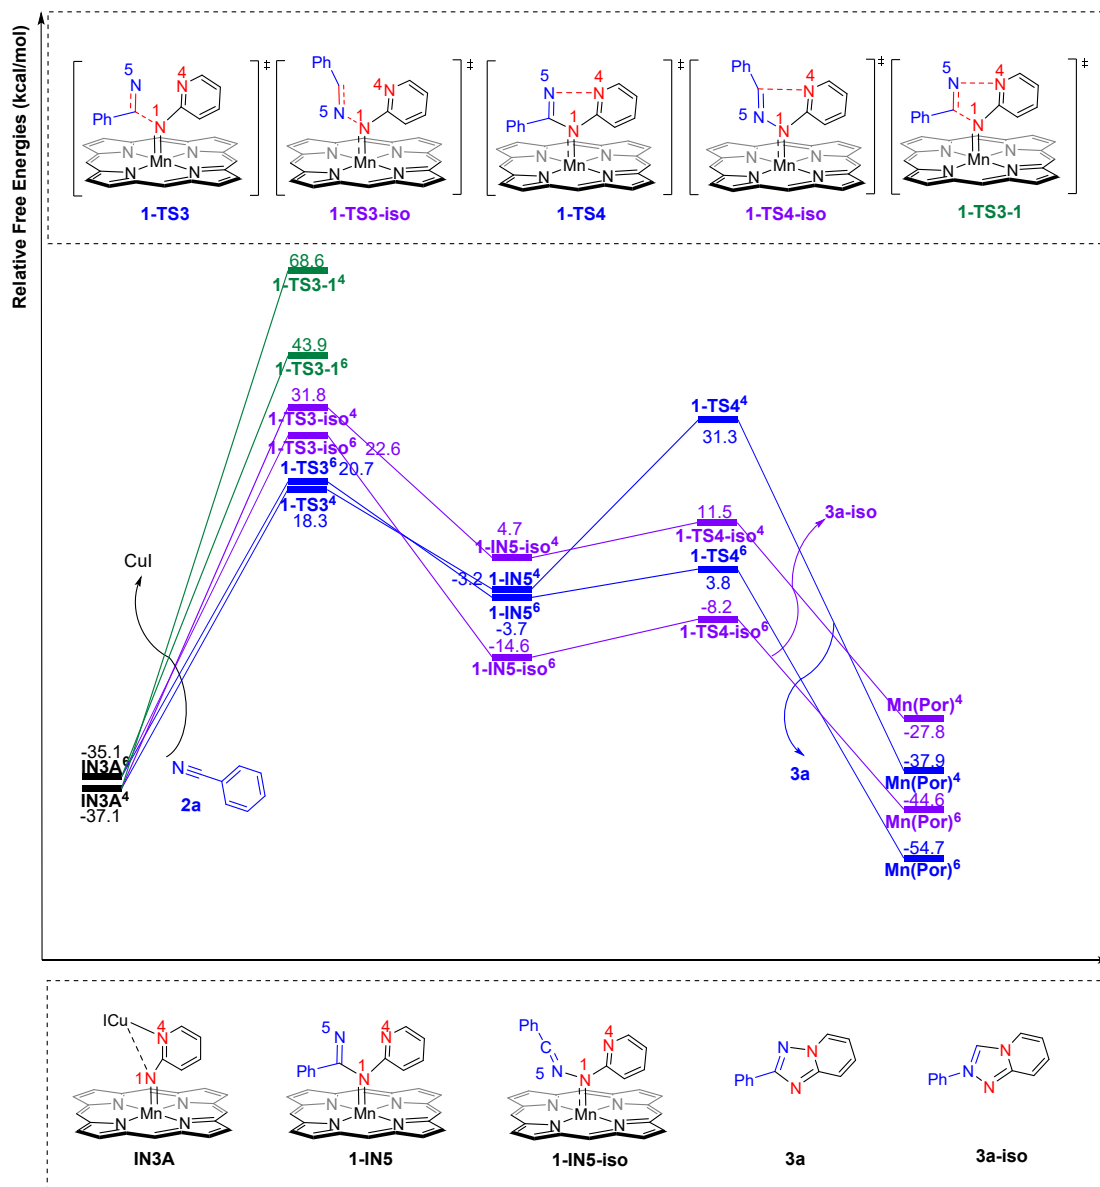

**Fig. S5** Calculated free-energy profiles for the last two steps of the denitrogenative annulation without the assistance of CuI. The stepwise pathway for the formation of regioisomer **3a** is shown in blue while that for the formation of regioisomer **3a-iso** is shown in purple. The synergistic pathway for the formation of regioisomer **3a** is shown in green. Numerical values are relative free energies in kcal/mol.

## Section 7. Relaxed energy scans for MECF

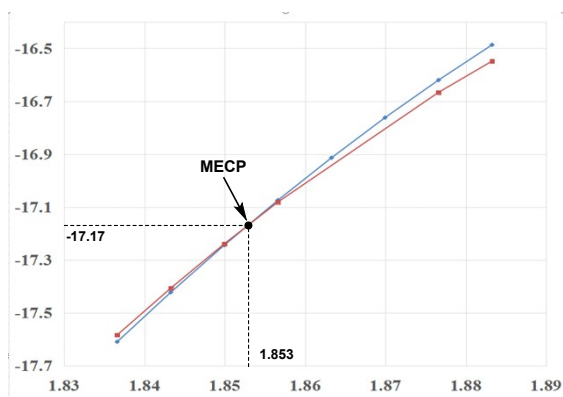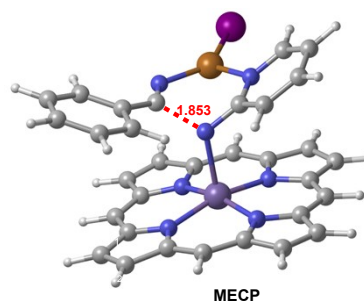

**Fig. S6** Relaxed energy scan in the quartet (red line) and sextet (blue line) states for MECP. The structure of MECP is show. Energies are given in kcal/mol and distance in angstroms.

## Section 8. Energies (in hartree) of All TSs and Intermediate

## Solvent=benzene:

| Geometry                    | $E_0$        | $E$          | $H_{373.15}$ | $G_{373.15}$ | $E_{(sol,M06)}$ |
|-----------------------------|--------------|--------------|--------------|--------------|-----------------|
| <b>CuI</b>                  | -207.603212  | -207.599467  | -207.598285  | -207.636238  | -208.8312141    |
| <b>ZnCl<sub>2</sub></b>     | -986.102572  | -986.098453  | -986.097272  | -986.134544  | -1147.678568    |
| <b>Mn(Por)<sup>2</sup></b>  | -1092.064902 | -1092.037791 | -1092.036609 | -1092.126433 | -1092.2535727   |
| <b>Mn(Por)<sup>4</sup></b>  | -1092.118567 | -1092.091386 | -1092.090205 | -1092.181133 | -1092.344648    |
| <b>Mn(Por)<sup>6</sup></b>  | -1092.132870 | -1092.105147 | -1092.103965 | -1092.196892 | -1092.368084    |
| <b>1a</b>                   | -411.790624  | -411.781921  | -411.780739  | -411.830160  | -411.7113978    |
| <b>IN1<sup>2</sup></b>      | -1503.890718 | -1503.853810 | -1503.852628 | -1503.963824 | -1504.0192894   |
| <b>IN1<sup>4</sup></b>      | -1503.920331 | -1503.881690 | -1503.880508 | -1504.000530 | -1504.077342    |
| <b>IN1<sup>6</sup></b>      | -1503.937695 | -1503.898517 | -1503.897336 | -1504.018719 | -1504.107253    |
| <b>IN1-iso<sup>2</sup></b>  | -1503.886219 | -1503.848084 | -1503.846902 | -1503.962664 | -1504.029473    |
| <b>IN1-iso<sup>4</sup></b>  | -1503.918491 | -1503.880864 | -1503.879682 | -1503.996495 | -1504.07341     |
| <b>IN1-iso<sup>6</sup></b>  | -1503.933256 | -1503.894020 | -1503.892838 | -1504.015444 | -1504.102596    |
| <b>TS1<sup>2</sup></b>      | -1503.853871 | -1503.815478 | -1503.814297 | -1503.930684 | -1503.983349    |
| <b>TS1<sup>4</sup></b>      | -1503.886316 | -1503.848388 | -1503.847206 | -1503.964983 | -1504.041653    |
| <b>TS1<sup>6</sup></b>      | -1503.902807 | -1503.863206 | -1503.862025 | -1503.986147 | -1504.072958    |
| <b>TS1-iso<sup>2</sup></b>  | -1503.820046 | -1503.779114 | -1503.777933 | -1503.904944 | -1503.940198    |
| <b>TS1-iso<sup>4</sup></b>  | -1503.844741 | -1503.803933 | -1503.802751 | -1503.930147 | -1504.030686    |
| <b>TS1-iso<sup>6</sup></b>  | -1503.854692 | -1503.813002 | -1503.811821 | -1503.942594 | -1504.059285    |
| <b>TS1'</b>                 | -411.757413  | -411.748470  | -411.747288  | -411.797524  | -411.6772503    |
| <b>IN2<sup>2</sup></b>      | -1503.867969 | -1503.829501 | -1503.828319 | -1503.943734 | -1504.009293    |
| <b>IN2<sup>4</sup></b>      | -1503.909166 | -1503.870093 | -1503.868911 | -1503.989574 | -1504.073238    |
| <b>IN2<sup>6</sup></b>      | -1503.923198 | -1503.883556 | -1503.882374 | -1504.005009 | -1504.099278    |
| <b>IN2-iso<sup>2</sup></b>  | -1503.877150 | -1503.837167 | -1503.835985 | -1503.961296 | -1503.992554    |
| <b>IN2-iso<sup>4</sup></b>  | -1503.900526 | -1503.861412 | -1503.860231 | -1503.982427 | -1504.063213    |
| <b>IN2-iso<sup>6</sup></b>  | -1503.914404 | -1503.873642 | -1503.872460 | -1504.000800 | -1504.073238    |
| <b>IN2A<sup>2</sup></b>     | -1711.532480 | -1711.532480 | -1711.532480 | -1711.532480 | -1712.861197    |
| <b>IN2A<sup>4</sup></b>     | -1711.557310 | -1711.511789 | -1711.510607 | -1711.651504 | -1712.947112    |
| <b>IN2A<sup>6</sup></b>     | -1711.567538 | -1711.521290 | -1711.520109 | -1711.663092 | -1712.975249    |
| <b>IN2B-iso<sup>2</sup></b> | -2490.023272 | -2489.975934 | -2489.974752 | -2490.115807 | -2651.734672    |
| <b>IN2B-iso<sup>4</sup></b> | -2490.050122 | -2490.002559 | -2490.001378 | -2490.143253 | -2651.797619    |
| <b>IN2B-iso<sup>6</sup></b> | -2490.052240 | -2490.004035 | -2490.002853 | -2490.148455 | -2651.788743    |
| <b>IN2'</b>                 | -411.784175  | -411.774022  | -411.772840  | -411.826215  | -411.71016      |
| <b>TS2<sup>2</sup></b>      | -1503.853796 | -1503.814251 | -1503.813070 | -1503.932122 | -1504.007880    |
| <b>TS2<sup>4</sup></b>      | -1503.882401 | -1503.842341 | -1503.841160 | -1503.962241 | -1504.051994    |
| <b>TS2<sup>6</sup></b>      | -1503.875962 | -1503.835591 | -1503.834409 | -1503.957710 | -1504.045462    |
| <b>TS2-iso<sup>4</sup></b>  | -1503.844741 | -1503.803933 | -1503.802751 | -1503.930147 | -1503.982244    |
| <b>TS2-iso<sup>6</sup></b>  | -1503.854692 | -1503.813002 | -1503.811821 | -1503.942594 | -1504.006092    |
| <b>TS2A<sup>2</sup></b>     | -1711.501750 | -1711.458051 | -1711.456870 | -1711.587341 | -1712.897223    |
| <b>TS2A<sup>4</sup></b>     | -1711.524780 | -1711.479465 | -1711.478284 | -1711.615324 | -1712.910058    |
| <b>TS2A<sup>6</sup></b>     | -1711.543610 | -1711.497904 | -1711.496722 | -1711.636226 | -1712.946862    |

|                         |              |              |              |              |               |
|-------------------------|--------------|--------------|--------------|--------------|---------------|
| TS2A-iso <sup>4</sup>   | -1711.533695 | -1711.487546 | -1711.486364 | -1711.629154 | -1712.930781  |
| TS2A-iso <sup>6</sup>   | -1711.528313 | -1711.483056 | -1711.481875 | -1711.623117 | -1712.918702  |
| TS2A-1 <sup>4</sup>     | -1711.528164 | -1711.482497 | -1711.481315 | -1711.619789 | -1712.93059   |
| TS2A-1 <sup>6</sup>     | -1711.522773 | -1711.476978 | -1711.475797 | -1711.615656 | -1712.927344  |
| TS2'                    | -411.711235  | -411.699925  | -411.698744  | -411.755962  | -411.6282063  |
| IN3 <sup>2</sup>        | -1394.424301 | -1394.387651 | -1394.386470 | -1394.500509 | -1394.585169  |
| IN3 <sup>4</sup>        | -1394.420823 | -1394.384148 | -1394.382966 | -1394.496450 | -1394.601626  |
| IN3 <sup>6</sup>        | -1394.410588 | -1394.373146 | -1394.371964 | -1394.489455 | -1394.595956  |
| IN3A <sup>2</sup>       | -1602.081828 | -1602.039560 | -1602.038378 | -1602.169675 | -1603.478174  |
| IN3A <sup>4</sup>       | -1602.085049 | -1602.042276 | -1602.041095 | -1602.173828 | -1603.506438  |
| IN3A <sup>6</sup>       | -1602.077889 | -1602.034975 | -1602.033794 | -1602.167543 | -1603.501959  |
| TS-iso <sup>4</sup>     | -1503.904089 | -1503.864799 | -1503.863618 | -1503.987820 | -1504.061736  |
| TS-iso <sup>6</sup>     | -1503.916945 | -1503.878355 | -1503.877174 | -1503.996683 | -1504.086396  |
| 1-TS3 <sup>2</sup>      | -1718.777011 | -1718.729983 | -1718.728801 | -1718.865124 | -1718.895305  |
| 1-TS3 <sup>4</sup>      | -1718.782174 | -1718.734564 | -1718.733382 | -1718.871252 | -1718.923823  |
| 1-TS3 <sup>6</sup>      | -1718.777439 | -1718.729526 | -1718.728344 | -1718.869713 | -1718.916219  |
| 1-TS3-1 <sup>4</sup>    | -1718.734158 | -1718.686328 | -1718.685146 | -1718.826499 | -1718.839481  |
| 1-TS3-1 <sup>6</sup>    | -1718.745835 | -1718.697088 | -1718.695906 | -1718.839312 | -1718.875156  |
| 1-TS3-iso <sup>4</sup>  | -1718.770324 | -1718.723498 | -1718.722317 | -1718.859280 | -1718.901438  |
| 1-TS3-iso <sup>6</sup>  | -1718.769561 | -1718.721739 | -1718.720558 | -1718.861695 | -1718.910625  |
| 1-TS3A <sup>2</sup>     | -1926.449689 | -1926.397198 | -1926.396016 | -1926.547720 | -1927.8047011 |
| 1-TS3A <sup>4</sup>     | -1926.457767 | -1926.404169 | -1926.402987 | -1926.561960 | -1927.833419  |
| 1-TS3A <sup>6</sup>     | -1926.455336 | -1926.401838 | -1926.400656 | -1926.559347 | -1927.829639  |
| 1-TS3A-iso <sup>2</sup> | -1926.414918 | -1926.362912 | -1926.361730 | -1926.514622 | -1927.7592364 |
| 1-TS3A-iso <sup>4</sup> | -1926.412680 | -1926.359392 | -1926.358210 | -1926.516134 | -1927.792146  |
| 1-TS3A-iso <sup>6</sup> | -1926.428193 | -1926.374423 | -1926.373242 | -1926.533811 | -1927.795883  |
| TS3'                    | -720.038988  | -720.017863  | -720.016681  | -720.099012  | -719.906733   |
| 1-IN4A <sup>2</sup>     | -1926.482494 | -1926.428420 | -1926.427238 | -1926.587069 | -1927.8223007 |
| 1-IN4A <sup>4</sup>     | -1926.480140 | -1926.425612 | -1926.424430 | -1926.591560 | -1927.833398  |
| 1-IN4A <sup>6</sup>     | -1926.476115 | -1926.420850 | -1926.419668 | -1926.589130 | -1927.838406  |
| 1-TS4 <sup>4</sup>      | -1718.781417 | -1718.736195 | -1718.736195 | -1718.865108 | -1718.910155  |
| 1-TS4 <sup>6</sup>      | -1718.802578 | -1718.802578 | -1718.802578 | -1718.890875 | -1718.948589  |
| 1-TS4-iso <sup>4</sup>  | -1718.801621 | -1718.754893 | -1718.753711 | -1718.893521 | -1718.934407  |
| 1-TS4-iso <sup>6</sup>  | -1718.825606 | -1718.778070 | -1718.776888 | -1718.919703 | -1718.961327  |
| 1-TS4A <sup>2</sup>     | -1926.437396 | -1926.385768 | -1926.384586 | -1926.536214 | -1927.78919   |
| 1-TS4A <sup>4</sup>     | -1926.465520 | -1926.413380 | -1926.412198 | -1926.566847 | -1927.8383    |
| 1-TS4A <sup>6</sup>     | -1926.470580 | -1926.418272 | -1926.417090 | -1926.570749 | -1927.841802  |
| 1-TS4A-iso <sup>2</sup> | -1926.426181 | -1926.374401 | -1926.373219 | -1926.524643 | -1927.762938  |
| 1-TS4A-iso <sup>4</sup> | -1926.451404 | -1926.399245 | -1926.398064 | -1926.553950 | -1927.804804  |
| 1-TS4A-iso <sup>6</sup> | -1926.464992 | -1926.412571 | -1926.411389 | -1926.565777 | -1927.831905  |
| TS4'                    | -720.036981  | -720.015810  | -720.014629  | -720.096594  | -719.9051516  |
| 1-IN5 <sup>4</sup>      | -1718.809921 | -1718.762598 | -1718.761416 | -1718.898688 | -1718.960952  |
| 1-IN5 <sup>6</sup>      | -1718.810104 | -1718.762807 | -1718.761626 | -1718.899297 | -1718.961295  |

|                                     |              |              |              |              |               |
|-------------------------------------|--------------|--------------|--------------|--------------|---------------|
| <b>1-IN5-iso<sup>4</sup></b>        | -1718.810158 | -1718.762208 | -1718.761026 | -1718.903920 | -1718.943719  |
| <b>1-IN5-iso<sup>6</sup></b>        | -1718.832923 | -1718.784410 | -1718.783228 | -1718.928133 | -1718.971331  |
| <b>1-IN5A<sup>2</sup></b>           | -1926.460661 | -1926.408462 | -1926.407280 | -1926.557775 | -1927.8012443 |
| <b>1-IN5A<sup>4</sup></b>           | -1926.497671 | -1926.445182 | -1926.444000 | -1926.596495 | -1927.828907  |
| <b>1-IN5A<sup>6</sup></b>           | -1926.497741 | -1926.445260 | -1926.444078 | -1926.597072 | -1927.881106  |
| <b>1-IN5A-iso<sup>2</sup></b>       | -1926.434059 | -1926.381987 | -1926.380805 | -1926.530925 | -1927.771059  |
| <b>1-IN5A-iso<sup>4</sup></b>       | -1926.461034 | -1926.408330 | -1926.407149 | -1926.560506 | -1927.831771  |
| <b>1-IN5A-iso<sup>6</sup></b>       | -1926.460222 | -1926.407551 | -1926.406369 | -1926.560156 | -1927.831218  |
| <b>2a</b>                           | -324.394458  | -324.385269  | -324.384087  | -324.434476  | -324.3316823  |
| <b>2b</b>                           | -308.286139  | -308.276270  | -308.275088  | -308.326495  | -308.231219   |
| <b>2-TS3<sup>2</sup></b>            | -1812.142226 | -1812.092354 | -1812.091172 | -1812.236349 | -1812.226298  |
| <b>2-TS3<sup>4</sup></b>            | -1812.165357 | -1812.114012 | -1812.112830 | -1812.269267 | -1812.265247  |
| <b>2-TS3<sup>6</sup></b>            | -1812.178540 | -1812.126643 | -1812.125461 | -1812.281735 | -1812.292435  |
| <b>2-IN3B<sup>4</sup></b>           | -2798.436277 | -2798.379469 | -2798.378288 | -2798.542493 | -2960.145833  |
| <b>2-IN3B<sup>6</sup></b>           | -2798.449647 | -2798.393417 | -2798.392235 | -2798.553716 | -2960.152249  |
| <b>2-TS3B<sup>2</sup></b>           | -2798.285957 | -2798.227496 | -2798.226314 | -2798.393774 | -2959.953383  |
| <b>2-TS3B<sup>4</sup></b>           | -2798.310580 | -2798.252632 | -2798.251451 | -2798.418617 | -2960.005058  |
| <b>2-TS3B<sup>6</sup></b>           | -2798.317101 | -2798.257994 | -2798.256813 | -2798.426703 | -2960.01293   |
| <b>2-IN4B<sup>4</sup></b>           | -2798.421510 | -2798.366004 | -2798.364822 | -2798.525789 | -2960.108559  |
| <b>2-IN4B<sup>6</sup></b>           | -2798.440084 | -2798.383916 | -2798.382734 | -2798.545119 | -2960.145036  |
| <b>2-TS4B<sup>2</sup></b>           | -2798.275693 | -2798.217360 | -2798.216178 | -2798.383483 | -2959.893852  |
| <b>2-TS4B<sup>4</sup></b>           | -2798.295690 | -2798.237364 | -2798.236183 | -2798.404208 | -2959.979452  |
| <b>2-TS4B<sup>6</sup></b>           | -2798.310192 | -2798.252975 | -2798.251794 | -2798.416963 | -2960.001821  |
| <b>3a</b>                           | -626.769449  | -626.753325  | -626.752143  | -626.819230  | -626.6512985  |
| <b>3a-iso</b>                       | -626.747949  | -626.731751  | -626.730569  | -626.797670  | -626.6349814  |
| <b>4b</b>                           | -720.163638  | -720.144489  | -720.143307  | -720.218916  | -720.0351351  |
| <b>5b</b>                           | -720.175501  | -720.156342  | -720.155160  | -720.231213  | -720.0456257  |
| <b>N<sub>2</sub></b>                | -109.509598  | -109.506643  | -109.505462  | -109.533616  | -109.4847258  |
| <b>MECP</b>                         | -            | -            | -            | -            | -1927.831026  |
| <b>1-TS3A-M06<sup>4</sup></b>       | -1925.313323 | -1925.260516 | -1925.259334 | -1925.409875 | -1927.7916129 |
| <b>1-TS3A-M06<sup>6</sup></b>       | -1925.310023 | -1925.257287 | -1925.256105 | -1925.407029 | -1927.8386374 |
| <b>1-TS3A-iso-M06<sup>4</sup></b>   | -1925.287731 | -1925.234771 | -1925.233589 | -1925.386517 | -1927.8163517 |
| <b>1-TS3A-iso-M06<sup>6</sup></b>   | -1925.280247 | -1925.227050 | -1925.225869 | -1925.381131 | -1927.8090197 |
| <b>2-TS3-M06<sup>4</sup></b>        | -1810.928430 | -1810.878302 | -1810.877120 | -1811.021344 | -1812.277381  |
| <b>2-TS3-M06<sup>6</sup></b>        | -1810.949066 | -1810.898062 | -1810.896880 | -1811.043441 | -1812.298737  |
| <b>2-TS3B-M06<sup>4</sup></b>       | -2796.888529 | -2796.830568 | -2796.829386 | -2796.990472 | -2960.01547   |
| <b>2-TS3B-M06<sup>6</sup></b>       | -2796.898098 | -2796.839839 | -2796.838657 | -2797.001386 | -2960.0259055 |
| <b>1-TS3A-BPW91<sup>4</sup></b>     | -1926.497900 | -1926.444885 | -1926.443703 | -1926.595769 | -1927.8141803 |
| <b>1-TS3A-BPW91<sup>6</sup></b>     | -1926.485771 | -1926.430919 | -1926.429738 | -1926.589969 | -1927.8245011 |
| <b>1-TS3A-iso-BPW91<sup>4</sup></b> | -1926.478157 | -1926.423473 | -1926.422291 | -1926.581532 | -1927.7955984 |
| <b>1-TS3A-iso-BPW91<sup>6</sup></b> | -1926.460489 | -1926.405233 | -1926.404051 | -1926.567009 | -1927.7889792 |

|                                        |              |              |              |              |               |
|----------------------------------------|--------------|--------------|--------------|--------------|---------------|
| <b>2-TS3-BPW91<sup>4</sup></b>         | -1812.092423 | -1812.039636 | -1812.038454 | -1812.191752 | -1812.265734  |
| <b>2-TS3-BPW91<sup>6</sup></b>         | -1812.085644 | -1812.031826 | -1812.030644 | -1812.190644 | -1812.284338  |
| <b>2-TS3B-BPW91<sup>4</sup></b>        | -2798.609148 | -2798.550084 | -2798.548903 | -2798.714536 | -2959.997953  |
| <b>2-TS3B-BPW91<sup>6</sup></b>        | -2798.317102 | -2798.257995 | -2798.256813 | -2798.426705 | -2960.0129432 |
| <b>1-TS3A-B3LYP-D3<sup>4</sup></b>     | -1926.568486 | -1926.515371 | -1926.514190 | -1926.667551 | -1927.838971  |
| <b>1-TS3A-B3LYP-D3<sup>6</sup></b>     | -1926.565280 | -1926.512108 | -1926.510926 | -1926.666243 | -1927.8360899 |
| <b>1-TS3A-iso-B3LYP-D3<sup>4</sup></b> | -1926.517193 | -1926.464557 | -1926.463375 | -1926.616798 | -1927.7937557 |
| <b>1-TS3A-iso-B3LYP-D3<sup>6</sup></b> | -1925.305314 | -1925.253245 | -1925.252063 | -1925.400171 | -1927.811979  |
| <b>2-TS3-B3LYP-D3<sup>4</sup></b>      | -1812.246671 | -1812.195849 | -1812.194668 | -1812.343216 | -1812.268758  |
| <b>2-TS3-B3LYP-D3<sup>6</sup></b>      | -1812.258138 | -1812.206609 | -1812.205427 | -1812.356760 | -1812.295898  |
| <b>2-TS3B-B3LYP-D3<sup>4</sup></b>     | -2798.409214 | -2798.350955 | -2798.349773 | -2798.514921 | -2960.011178  |
| <b>2-TS3B-B3LYP-D3<sup>6</sup></b>     | -2798.413685 | -2798.355142 | -2798.353960 | -2798.519848 | -2960.019453  |
| <b>1-TS3A-TPP<sup>4</sup></b>          | -2850.334156 | -2850.250754 | -2850.249572 | -2850.476238 | -2851.547090  |
| <b>1-TS3A-TPP<sup>6</sup></b>          | -2850.331336 | -2850.247852 | -2850.246670 | -2850.477871 | -2851.5435889 |
| <b>1-TS3A-iso-TPP<sup>4</sup></b>      | -2850.315203 | -2850.231642 | -2850.230461 | -2850.459281 | -2851.5219161 |
| <b>1-TS3A-iso-TPP<sup>6</sup></b>      | -2850.311387 | -2850.227697 | -2850.226515 | -2850.456834 | -2851.5183211 |
| <b>2-TS3-TPP<sup>4</sup></b>           | -2736.040977 | -2735.960483 | -2735.959301 | -2736.180951 | -2735.978318  |
| <b>2-TS3-TPP<sup>6</sup></b>           | -2736.053699 | -2735.971551 | -2735.970369 | -2736.196462 | -2736.005791  |
| <b>2-TS3B-TPP<sup>4</sup></b>          | -3722.182023 | -3722.093153 | -3722.091971 | -3722.336437 | -3883.6977946 |
| <b>2-TS3B-TPP<sup>6</sup></b>          | -3722.193392 | -3722.103864 | -3722.102682 | -3722.346243 | -3883.7276336 |

$E_0$  = Sum of electronic and zero-point energies calculated by B3LYP in solvent

$E$  = Sum of electronic and thermal energies calculated by B3LYP in solvent

$H_{373.15}$  = Sum of electronic and thermal enthalpies calculated by B3LYP in solvent

$G_{373.15}$  = Sum of electronic and thermal free energies calculated by B3LYP-D3 in solvent

$E_{(\text{sol},\text{M06})}$  = Single point energies calculated by M06 in solvent

## Section 9. Calculated imaginary frequencies of all transition states

species

| Species                 | Frequency |
|-------------------------|-----------|
| TS1 <sup>2</sup>        | -234.87   |
| TS1 <sup>4</sup>        | -263.12   |
| TS1 <sup>6</sup>        | -249.09   |
| TS1'                    | -275.41   |
| TS1-iso <sup>2</sup>    | -259.33   |
| TS1-iso <sup>4</sup>    | -259.88   |
| TS1-iso <sup>6</sup>    | -246.01   |
| TS2 <sup>2</sup>        | -457.29   |
| TS2 <sup>4</sup>        | -525.61   |
| TS2 <sup>6</sup>        | -536.25   |
| TS2-iso <sup>4</sup>    | -749.47   |
| TS2-iso <sup>6</sup>    | -758.83   |
| TS2A <sup>2</sup>       | -577.23   |
| TS2A <sup>4</sup>       | -632.67   |
| TS2A <sup>6</sup>       | -495.92   |
| TS2A-1 <sup>4</sup>     | -506.99   |
| TS2A-1 <sup>6</sup>     | -508.02   |
| TS2A-iso <sup>4</sup>   | -347.17   |
| TS2A-iso <sup>6</sup>   | -414.53   |
| TS2'                    | -305.75   |
| TS-iso <sup>4</sup>     | -17.02    |
| TS-iso <sup>6</sup>     | -49.95    |
| 1-TS3 <sup>2</sup>      | -537.24   |
| 1-TS3 <sup>4</sup>      | -421.12   |
| 1-TS3 <sup>6</sup>      | -417.11   |
| 1-TS3-1 <sup>4</sup>    | -388.36   |
| 1-TS3-1 <sup>6</sup>    | -343.18   |
| 1-TS3-iso <sup>4</sup>  | -523.88   |
| 1-TS3-iso <sup>6</sup>  | -498.95   |
| 1-TS3A <sup>2</sup>     | -477.12   |
| 1-TS3A <sup>4</sup>     | -428.24   |
| 1-TS3A <sup>6</sup>     | -419.84   |
| 1-TS3A-iso <sup>2</sup> | -444.03   |
| 1-TS3A-iso <sup>4</sup> | -519.09   |
| 1-TS3A-iso <sup>6</sup> | -550.20   |
| TS3'                    | -421.33   |



|                                        |          |
|----------------------------------------|----------|
| <b>1-TS4<sup>4</sup></b>               | -526.87  |
| <b>1-TS4<sup>6</sup></b>               | -701.79  |
| <b>1-TS4-iso<sup>4</sup></b>           | -158.15  |
| <b>1-TS4-iso<sup>6</sup></b>           | -145.85  |
| <b>1-TS4A<sup>2</sup></b>              | -1385.49 |
| <b>1-TS4A<sup>4</sup></b>              | -839.12  |
| <b>1-TS4A<sup>6</sup></b>              | -239.75  |
| <b>1-TS4A-iso<sup>2</sup></b>          | -32.06   |
| <b>1-TS4A-iso<sup>4</sup></b>          | -106.29  |
| <b>1-TS4A-iso<sup>6</sup></b>          | -202.45  |
| <b>TS4'</b>                            | -358.02  |
| <b>2-TS3<sup>2</sup></b>               | -415.24  |
| <b>2-TS3<sup>4</sup></b>               | -410.13  |
| <b>2-TS3<sup>6</sup></b>               | -413.33  |
| <b>2-TS3B<sup>2</sup></b>              | -463.70  |
| <b>2-TS3B<sup>4</sup></b>              | -480.39  |
| <b>2-TS3B<sup>6</sup></b>              | -341.86  |
| <b>2-TS4B<sup>2</sup></b>              | -340.97  |
| <b>2-TS4B<sup>4</sup></b>              | -341.99  |
| <b>2-TS4B<sup>6</sup></b>              | -342.83  |
| <b>1-TS3A-M06<sup>4</sup></b>          | -457.07  |
| <b>1-TS3A-M06<sup>6</sup></b>          | -437.32  |
| <b>1-TS3A-iso-M06<sup>4</sup></b>      | -580.23  |
| <b>1-TS3A-iso-M06<sup>6</sup></b>      | -619.08  |
| <b>2-TS3-M06<sup>4</sup></b>           | -487.81  |
| <b>2-TS3-M06<sup>6</sup></b>           | -358.02  |
| <b>2-TS3B-M06<sup>4</sup></b>          | -565.56  |
| <b>2-TS3B-M06<sup>6</sup></b>          | -473.58  |
| <b>1-TS3A-BPW91<sup>4</sup></b>        | -268.79  |
| <b>1-TS3A-BPW91<sup>6</sup></b>        | -209.66  |
| <b>1-TS3A-iso-BPW91<sup>4</sup></b>    | -409.94  |
| <b>1-TS3A-iso-BPW91<sup>6</sup></b>    | -435.50  |
| <b>2-TS3-BPW91<sup>4</sup></b>         | -290.70  |
| <b>2-TS3-BPW91<sup>6</sup></b>         | -311.38  |
| <b>2-TS3B-BPW91<sup>4</sup></b>        | -297.09  |
| <b>2-TS3B-BPW91<sup>6</sup></b>        | -342.19  |
| <b>1-TS3A-B3LYP-D3<sup>4</sup></b>     | -402.39  |
| <b>1-TS3A-B3LYP-D3<sup>6</sup></b>     | -332.41  |
| <b>1-TS3A-iso-B3LYP-D3<sup>4</sup></b> | -571.63  |
| <b>1-TS3A-iso-B3LYP-D3<sup>6</sup></b> | -633.29  |
| <b>2-TS3-B3LYP-D3<sup>4</sup></b>      | -410.06  |
| <b>2-TS3-B3LYP-D3<sup>6</sup></b>      | -402.90  |
| <b>2-TS3B-B3LYP-D3<sup>4</sup></b>     | -465.64  |

|                                    |         |
|------------------------------------|---------|
| <b>2-TS3B-B3LYP-D3<sup>6</sup></b> | -390.25 |
| <b>1-TS3A-TPP<sup>4</sup></b>      | -420.85 |
| <b>1-TS3A-TPP<sup>6</sup></b>      | -409.62 |
| <b>1-TS3A-iso-TPP<sup>4</sup></b>  | -465.21 |
| <b>1-TS3A-iso-TPP<sup>6</sup></b>  | -505.06 |
| <b>2-TS3-TPP<sup>4</sup></b>       | -407.93 |
| <b>2-TS3-TPP<sup>6</sup></b>       | -402.51 |
| <b>2-TS3B-TPP<sup>4</sup></b>      | -364.81 |
| <b>2-TS3B-TPP<sup>6</sup></b>      | -351.22 |
